# Supplementary material for: One-step hydrothermal method for preparation of Ni/carbon thin film electrodes for efficient electroreduction of imidacloprid
Source: Royal Society of Chemistry journal article supplement (doi:10.1039/d0nj05509c), 2021-01-01

15.04.19

## Name and formula

Reference code: 00-044-1159

Compound name: Nickel Oxide

Empirical formula: NiO

Chemical formula: NiO

## Crystallographic parameters

Crystal system: Rhombohedral

Space group: R-3m

Space group number: 166

a (?): 2.9552

b (?): 2.9552

c (?): 7.2275

Alpha (°): 90.0000

Beta (°): 90.0000

Gamma (°): 120.0000

Calculated density (g/cm<sup>3</sup>): 6.81

Volume of cell (10<sup>-6</sup> pm<sup>3</sup>): 54.66

Z: 3.00

RIR: 2.10

## Subfiles and quality

Subfiles: Alloy, metal or intermetallic  
Corrosion  
Forensic  
Inorganic

Quality: Star (S)

## Comments

Color: Light green

Creation Date: 1970/1/1

Modification Date: 1970/1/1

Sample Preparation: Sample obtained from Merck (puriss.). For better crystallization, annealed at 1300 C for 5 hours and quenched

Color: Light green

Temperature of Data Collection: Pattern taken at 22 C

Additional Patterns: Second cubic polymorph known (see 00-004-0835)  
Additional Patterns: To replace 00-022-1189.

## References

Primary reference: Wes, S., Eysel W., Mineral.-Petrograph., Institut der Universitaet Heidelberg, Germany., *ICDD Grant-in-Aid*, (1992)

## Peak list

| No. | h | k | l | d [Å]   | 2Theta[deg] | I [%] |
|-----|---|---|---|---------|-------------|-------|
| 1   | 1 | 0 | 1 | 2.41197 | 37.249      | 60.0  |
| 2   | 0 | 1 | 2 | 2.08849 | 43.287      | 100.0 |
| 3   | 1 | 1 | 0 | 1.47733 | 62.854      | 30.0  |
| 4   | 1 | 0 | 4 | 1.47607 | 62.914      | 25.0  |
| 5   | 1 | 1 | 3 | 1.25955 | 75.406      | 14.0  |
| 6   | 2 | 0 | 2 | 1.20624 | 79.374      | 9.0   |
| 7   | 0 | 0 | 6 | 1.20460 | 79.504      | 4.0   |
| 8   | 0 | 2 | 4 | 1.04433 | 95.055      | 6.0   |
| 9   | 2 | 1 | 1 | 0.95882 | 106.909     | 4.0   |
| 10  | 2 | 0 | 5 | 0.95817 | 107.013     | 2.0   |
| 11  | 1 | 0 | 7 | 0.95761 | 107.104     | 2.0   |
| 12  | 1 | 2 | 2 | 0.93437 | 111.057     | 7.0   |
| 13  | 1 | 1 | 6 | 0.93363 | 111.188     | 7.0   |
| 14  | 2 | 1 | 4 | 0.85282 | 129.174     | 7.0   |
| 15  | 0 | 1 | 8 | 0.85187 | 129.443     | 3.0   |

## Stick Pattern

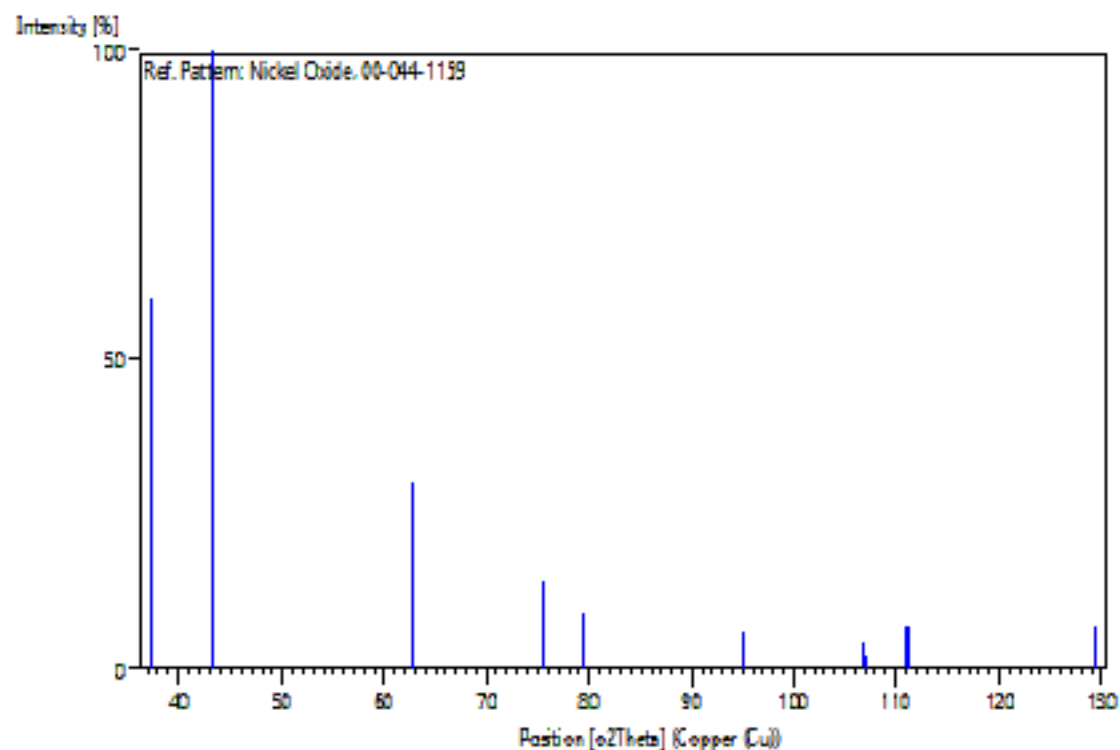

Supplement: d0nj05509c1.pdf [file d0nj05509c1.pdf]
