# Supplementary material for: One-step hydrothermal method for preparation of Ni/carbon thin film electrodes for efficient electroreduction of imidacloprid
Source: Royal Society of Chemistry journal article supplement (doi:10.1039/d0nj05509c), 2021-01-01

15-06-02

## **Name and formula**

Reference code: 00-004-0850

Mineral name: Nickel, syn

Compound name: Nickel

Empirical formula: Ni

Chemical formula: Ni

## **Crystallographic parameters**

Crystal system: Cubic

Space group: Fm-3m

Space group number: 225

a (?): 3.5238

b (?): 3.5238

c (?): 3.5238

Alpha (°): 90.0000

Beta (°): 90.0000

Gamma (°): 90.0000

Calculated density (g/cm<sup>3</sup>): 8.91

Volume of cell (10<sup>-6</sup> pm<sup>3</sup>): 43.76

Z: 4.00

RIR: -

## **Subfiles and quality**

Subfiles: Alloy, metal or intermetallic

Common Phase

Educational pattern

Forensic

Inorganic

Mineral

NBS pattern

Quality: Star (S)

## **Comments**

Color: White

Creation Date: 1970/1/1

Modification Date: 1970/1/1  
Color: White  
Sample Source or Locality: Sample obtained from Johnson Matthey Company, Ltd  
Analysis: Spectrographic analysis show <0.01% each of Mg, Si and Ca  
Temperature of Data Collection: Pattern taken at 26 C  
Additional Patterns: See ICSD 64989 (PDF 01-087-0712).

## References

Primary reference: Swanson, Tatge., *Natl. Bur. Stand. (U.S.), Circ 539*, I, 13, (1953)

## Peak list

| No. | h | k | l | d [Å]   | 2Theta[deg] | I [%] |
|-----|---|---|---|---------|-------------|-------|
| 1   | 1 | 1 | 1 | 2.03400 | 44.508      | 100.0 |
| 2   | 2 | 0 | 0 | 1.76200 | 51.847      | 42.0  |
| 3   | 2 | 2 | 0 | 1.24600 | 76.372      | 21.0  |
| 4   | 3 | 1 | 1 | 1.06240 | 92.947      | 20.0  |
| 5   | 2 | 2 | 2 | 1.01720 | 98.449      | 7.0   |
| 6   | 4 | 0 | 0 | 0.88100 | 121.936     | 4.0   |
| 7   | 3 | 3 | 1 | 0.80840 | 144.679     | 14.0  |
| 8   | 4 | 2 | 0 | 0.78800 | 155.666     | 15.0  |

## Stick Pattern

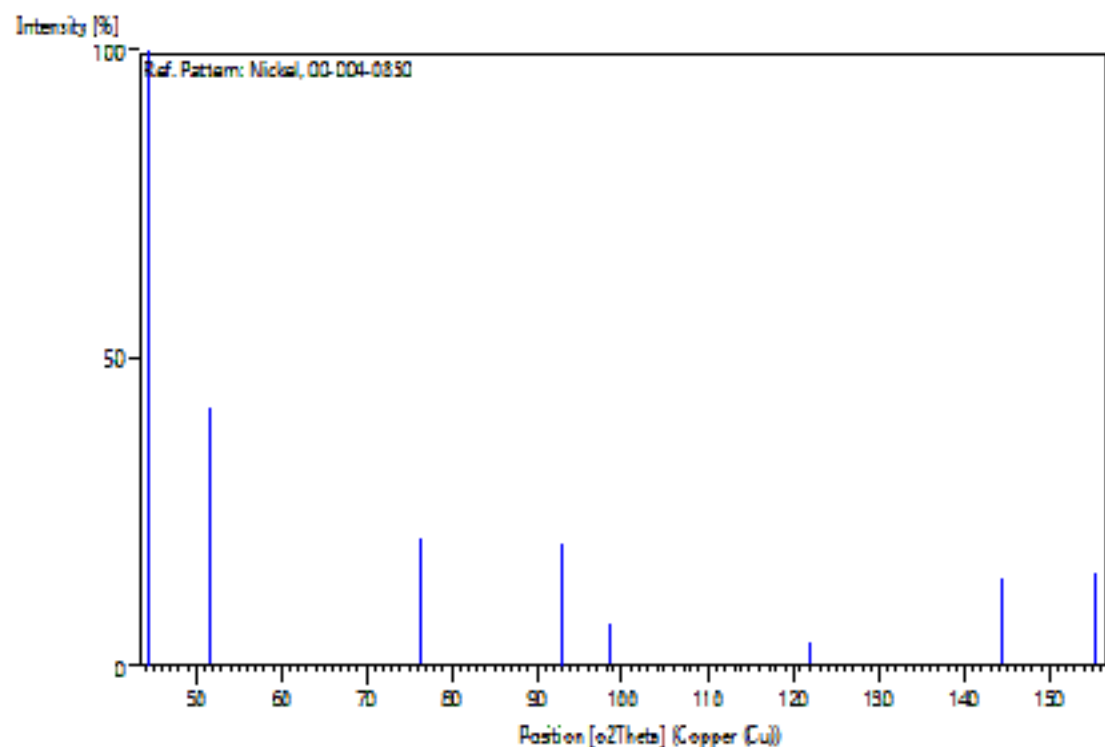

Supplement: d0nj05509c3.pdf [file d0nj05509c3.pdf]
