# Supplementary figures and images for: One-step hydrothermal method for preparation of Ni/carbon thin film electrodes for efficient electroreduction of imidacloprid
Source: Royal Society of Chemistry journal article supplement (doi:10.1039/d0nj05509c), 2021-01-01

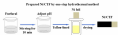

Electrochromic of ERD by NACTF

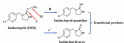

Supplement: d0nj05509c2.pdf [file d0nj05509c2.pdf]
